# Supplementary material for: Hydrogen Fertilization with Hydrogen Nanobubble Water Improves Yield and Quality of Cherry Tomatoes Compared to the Conventional Fertilizers
Source: MDPI journal article supplement (doi:10.3390/plants13030443), 2024-02-02
Supplement: s1 [file s1]

## Supplemental Materials

**Table S1.** Profiles of volatiles in cherry tomatoes (2021). Values are mean  $\pm$  SD of three independent experiments. ND: not detected; SW: surface water; HNW: hydrogen nanobubble water; SW + F: surface water plus fertilizers; HNW+F: hydrogen nanobubble water plus fertilizers.

| Code | Family                                                 | Compound                   | Concentration (mg kg <sup>-1</sup> ) |                   |                   |                   |
|------|--------------------------------------------------------|----------------------------|--------------------------------------|-------------------|-------------------|-------------------|
|      |                                                        |                            | SW                                   | HNW               | SW+F              | HNW+F             |
| 1    | Aldehydes<br>(average proportion:<br>77.1% $\pm$ 1.6%) | Hexanal                    | 0.278 $\pm$ 0.052                    | 0.463 $\pm$ 0.050 | 0.179 $\pm$ 0.031 | 0.447 $\pm$ 0.036 |
| 2    |                                                        | (E)-2-Hexenal              | 0.431 $\pm$ 0.049                    | 0.444 $\pm$ 0.000 | 0.362 $\pm$ 0.014 | 0.294 $\pm$ 0.094 |
| 3    |                                                        | 2-Methyl-4-pentenal        | 0.122 $\pm$ 0.009                    | 0.031 $\pm$ 0.044 | 0.121 $\pm$ 0.007 | 0.017 $\pm$ 0.024 |
| 4    |                                                        | Methional                  | 0.002 $\pm$ 0.003                    | 0.004 $\pm$ 0.006 | 0.007 $\pm$ 0.001 | 0.003 $\pm$ 0.005 |
| 5    |                                                        | Benzeneacetaldehyde        | 0.035 $\pm$ 0.001                    | 0.008 $\pm$ 0.011 | 0.043 $\pm$ 0.001 | 0.034 $\pm$ 0.008 |
| 6    |                                                        | Decanal                    | 0.004 $\pm$ 0.001                    | 0.002 $\pm$ 0.003 | 0.005 $\pm$ 0.001 | 0.006 $\pm$ 0.000 |
| 7    |                                                        | (E,E)-2,4-Hexadienal       | 0.012 $\pm$ 0.001                    | 0.022 $\pm$ 0.019 | 0.015 $\pm$ 0.002 | 0.006 $\pm$ 0.001 |
| 8    |                                                        | (Z)-2-Heptenal             | 0.007 $\pm$ 0.001                    | 0.002 $\pm$ 0.003 | 0.003 $\pm$ 0.004 | 0.016 $\pm$ 0.007 |
| 9    |                                                        | (E)-4-Oxohex-2-enal        | 0.022 $\pm$ 0.007                    | 0.024 $\pm$ 0.012 | 0.034 $\pm$ 0.001 | 0.012 $\pm$ 0.016 |
| 10   |                                                        | Nonanal, 3-(methylthio)-   | 0.002 $\pm$ 0.003                    | ND                | ND                | 0.002 $\pm$ 0.003 |
| 11   |                                                        | Nonanal                    | ND                                   | 0.014 $\pm$ 0.019 | ND                | 0.047 $\pm$ 0.029 |
| 12   |                                                        | 5-Methyl-hexanal           | ND                                   | ND                | 0.002 $\pm$ 0.003 | ND                |
| 13   |                                                        | (E)-2-Octenal              | ND                                   | ND                | ND                | 0.008 $\pm$ 0.011 |
| 14   |                                                        | (E)-2-Nonenal              | 0.002 $\pm$ 0.003                    | ND                | ND                | ND                |
| 15   | Alcohols<br>(average proportion:<br>12.3% $\pm$ 4.8%)  | trans-1,2-Cyclopentanediol | 0.048 $\pm$ 0.004                    | 0.060 $\pm$ 0.006 | 0.034 $\pm$ 0.013 | 0.020 $\pm$ 0.002 |
| 16   |                                                        | 2-Ethyl-1-hexanol          | 0.010 $\pm$ 0.000                    | 0.004 $\pm$ 0.006 | 0.007 $\pm$ 0.001 | 0.004 $\pm$ 0.006 |
| 17   |                                                        | Phenylethyl alcohol        | 0.075 $\pm$ 0.002                    | 0.075 $\pm$ 0.001 | 0.089 $\pm$ 0.005 | 0.069 $\pm$ 0.011 |

|    |                                           |                                                                     |             |             |             |             |
|----|-------------------------------------------|---------------------------------------------------------------------|-------------|-------------|-------------|-------------|
| 18 |                                           | 2,4,6-Trimethyl-1,6-heptadien-4-ol                                  | 0.023±0.000 | 0.009±0.012 | 0.006±0.009 | 0.007±0.010 |
| 19 |                                           | Benzene-1,2-diol, 4-(2-guanidinothiazol-4-yl)-                      | 0.005±0.000 | 0.003±0.004 | 0.004±0.000 | ND          |
| 20 |                                           | 3-Hepten-1-ol                                                       | 0.001±0.002 | 0.008±0.004 | ND          | ND          |
| 21 |                                           | cis-1,3-Cyclopentanediol                                            | 0.004±0.006 | ND          | ND          | ND          |
| 22 |                                           | cis-2-Methylcyclohexanol                                            | 0.004±0.001 | ND          | ND          | ND          |
| 23 |                                           | 5-Methyl-5-hexen-2-ol                                               | 0.002±0.003 | ND          | ND          | ND          |
| 24 |                                           | E,E-2,6-Dimethyl-3,5,7-octatriene-2-ol                              | 0.001±0.002 | ND          | ND          | 0.003±0.001 |
| 25 | Esters                                    | Carbamic acid, (2-methylphenyl)methyl ester                         | 0.019±0.003 | 0.009±0.002 | 0.020±0.002 | 0.026±0.005 |
| 26 | (average proportion: 1.9% ± 1.5%)         | Decanoic acid, ethyl ester                                          | 0.004±0.000 | ND          | 0.002±0.004 | 0.005±0.000 |
| 27 |                                           | Isobutyl acrylate                                                   | ND          | 0.002±0.003 | ND          | 0.001±0.002 |
| 28 |                                           | Oxalic acid, isohexyl neopentyl ester                               | ND          | ND          | ND          | 0.001±0.001 |
| 29 | Phenols (average proportion: 2.1% ± 1.2%) | 2,4-Bis(1,1-dimethylethyl)-phenol                                   | 0.020±0.002 | 0.022±0.006 | 0.030±0.011 | 0.022±0.001 |
| 30 | Others (average proportion: 6.6% ± 2.9%)  | L-Isoleucine                                                        | 0.012±0.016 | 0.042±0.031 | ND          | ND          |
| 31 |                                           | 1,6-Anhydro-3,4-dideoxy-.beta.-D-manno-hexapyranose                 | 0.013±0.018 | ND          | ND          | 0.012±0.006 |
| 32 |                                           | Benzene, 1-(1-hydroxyheptyl)-3-[1-(tetrahydropyran-2-yloxy)heptyl]- | ND          | 0.006±0.008 | 0.005±0.007 | ND          |
| 33 |                                           | Oxetane, 2-methyl-4-propyl-                                         | 0.006±0.000 | 0.003±0.004 | 0.002±0.003 | 0.002±0.003 |
| 34 |                                           | Benzyl nitrile                                                      | 0.014±0.000 | 0.004±0.005 | 0.011±0.000 | 0.022±0.011 |
| 35 |                                           | Octyl-oxirane                                                       | 0.005±0.000 | ND          | ND          | 0.004±0.005 |
| 36 |                                           | Propanoic acid, 3-hydroxy-, hydrazide                               | ND          | ND          | 0.009±0.012 | 0.002±0.003 |
| 37 |                                           | 4-(2,2,6-Trimethyl-7-oxabicyclo[4.1.0]hept-1-yl)-3-buten-2-one      | 0.003±0.004 | ND          | ND          | 0.003±0.001 |
| 38 |                                           | Bis(3-methylbutyl) fluorene-2,7-disulfonate                         | 0.004±0.000 | ND          | 0.004±0.000 | 0.004±0.005 |

|    |                                                                             |             |    |             |             |
|----|-----------------------------------------------------------------------------|-------------|----|-------------|-------------|
| 39 | Hydroxylamine, O-decyl-                                                     | 0.006±0.001 | ND | 0.005±0.001 | 0.003±0.004 |
| 40 | Decane, 6-ethyl-2-methyl-                                                   | ND          | ND | ND          | 0.001±0.001 |
| 41 | trans- $\beta$ -Ionone                                                      | ND          | ND | ND          | 0.003±0.000 |
| 42 | 1H-Pyrrole, 2,5-dihydro-1-nitroso-                                          | 0.007±0.010 | ND | 0.036±0.011 | ND          |
| 43 | 2-Isobutylthiazole                                                          | ND          | ND | ND          | 0.022±0.022 |
| 44 | Thieno[2,3-c]furan-3-carbonitrile, 2-amino-4,6-dihydro-4,4,6,6-tetramethyl- | ND          | ND | 0.003±0.005 | ND          |
| 45 | 1,2-Epoxyundecane                                                           | ND          | ND | 0.008±0.000 | ND          |
| 46 | Valeric acid hydrazide                                                      | ND          | ND | 0.004±0.000 | ND          |
| 47 | Methyl 2-methoxypropenoate                                                  | 0.005±0.007 | ND | ND          | ND          |
| 48 | 4-Hydroxybutyric acid hydrazide                                             | ND          | ND | 0.001±0.002 | ND          |
| 49 | Hydrazinecarboxamide                                                        | ND          | ND | ND          | 0.007±0.010 |

**Table S2.** Primers of qPCR used in this study.

| Gene                             | Forward primer (5'–3')    | Reverse primer (5'–3')    |
|----------------------------------|---------------------------|---------------------------|
| <i>SLACT</i> (NM_001330119.1)    | CGGTGACCACTTTCCGATCT      | TCCTCACCGTCAGCCATTTT      |
| <i>18S rRNA</i> (XM_004241429.4) | GGGCATTCGTATTTTCATAGTCAGA | GTTCTTGATTAATGAAAACATCCT  |
| <i>SIPSY1</i> (NM_001347838.1)   | TGGCCCAAACGCATCATATA      | CACCATCGAGCATGTCAAATG     |
| <i>SIPDS</i> (NM_001247166.2)    | TGCCAAACCACCACAAATTTCA    | CCAATTTGAGGCATTTTACTCGGA  |
| <i>LeAMT2</i> (NM_001247324.2)   | TTGTACCGCCGCTCTGACAACTTT  | CATGGCTCAACAACCTGCACAACCT |
| <i>LePT2</i> (NM_001247114.1)    | CATTGGACACTGGAGGCTAACC    | ATAAGAACCCATACGCTCCCA     |
| <i>LePT5</i> (XM_004240903.4)    | GGCGAATGAAGATGCCTGAAAC    | TACCAATTAAGTGATGTCCGTG    |
| <i>SIHKT1,1</i> (NM_001308344.1) | TGTTTTGTGCTTTGGAGTGGA     | GGGGGTGAAAGAGTGGAGAT      |

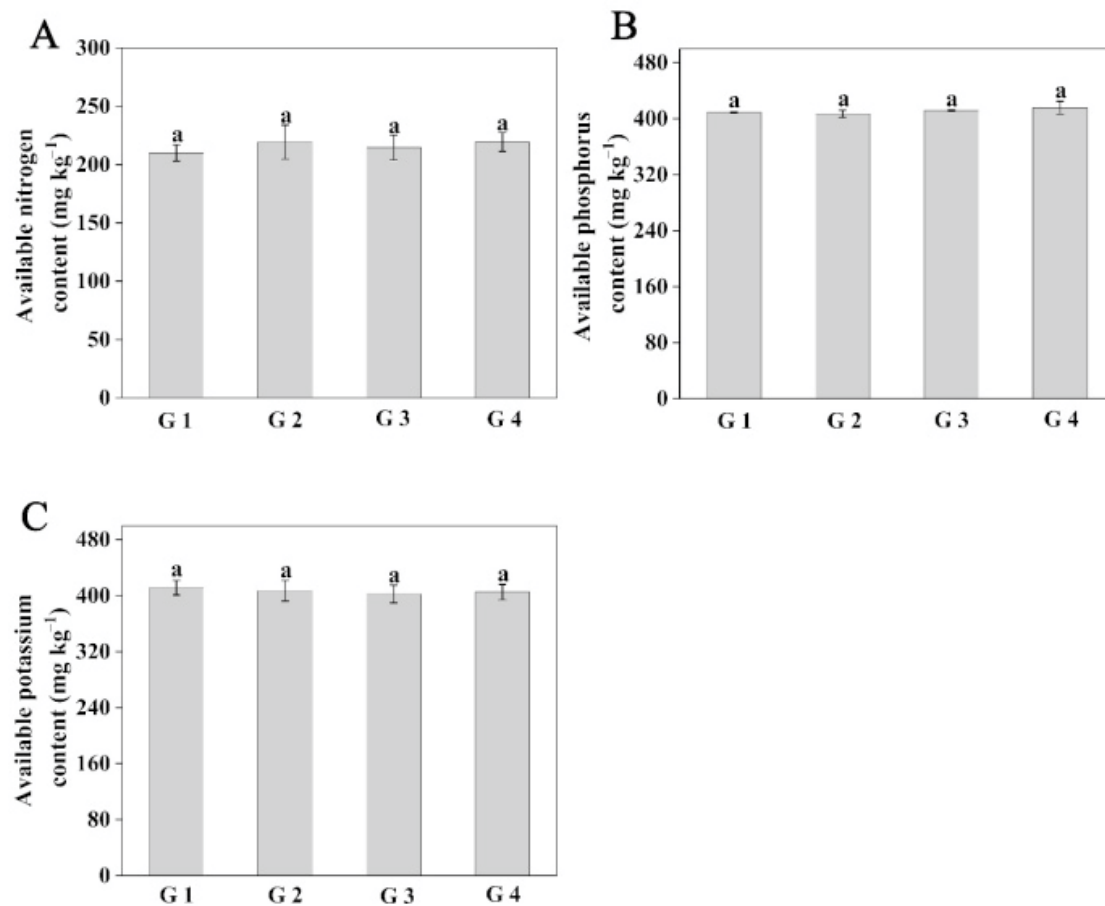

**Figure S1.** The contents of available nitrogen (A), available phosphorus (B), and available potassium (C) in soil of four greenhouses before fertilizing (Shanghai, 2021). The different letters indicate significant differences at  $p < 0.05$  (one-way ANOVA; Duncan's multiple range tests). G 1: greenhouse 1; G 2: greenhouse 2; G 3: greenhouse 3; G 4: greenhouse 4.

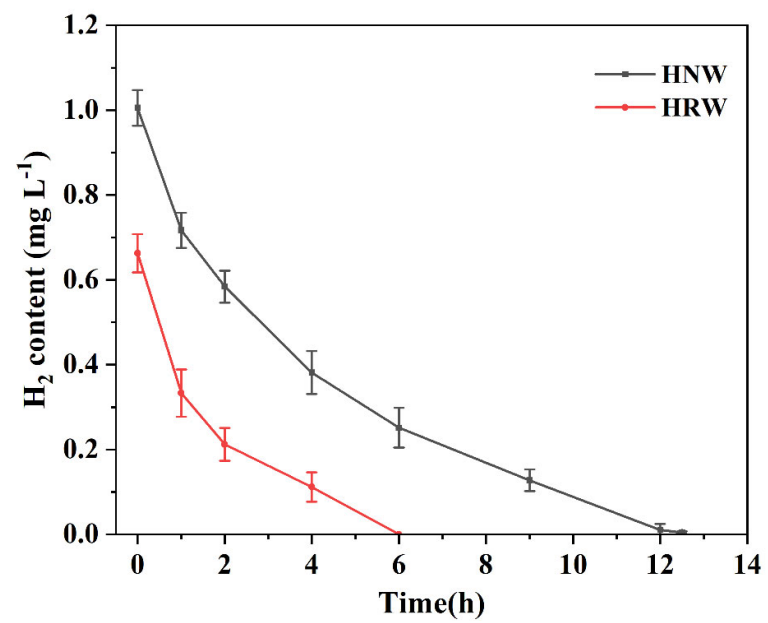

**Figure S2.** Changes in H<sub>2</sub> content of fresh HRW and HNW. HRW: hydrogen-rich water; HNW: hydrogen nanobubble water.

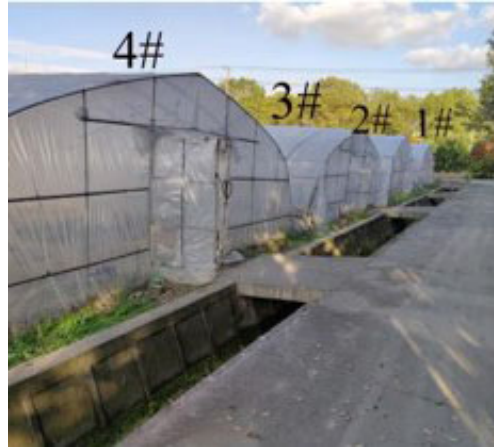

**Figure S3.** The design and location information of the four greenhouses (Shanghai, 2021). 1#: Irrigation with surface water (SW) and normal fertilization; 2#: Irrigation with SW and free of fertilization; 3#: Irrigation with hydrogen nanobubble water (HNW) and normal fertilization; 4#: Irrigation with HNW and free of fertilization.
